# Supplementary material for: Separation and preparation of nanoparticles of urban dust for biological studies
Source: Royal Society of Chemistry journal article supplement (doi:10.1039/d4ay01592d), 2024-12-02
Supplement: d4ay01592d1.pdf [file d4ay01592d1.pdf]

## Separation and preparation of nanoparticles of urban dust for biological studies

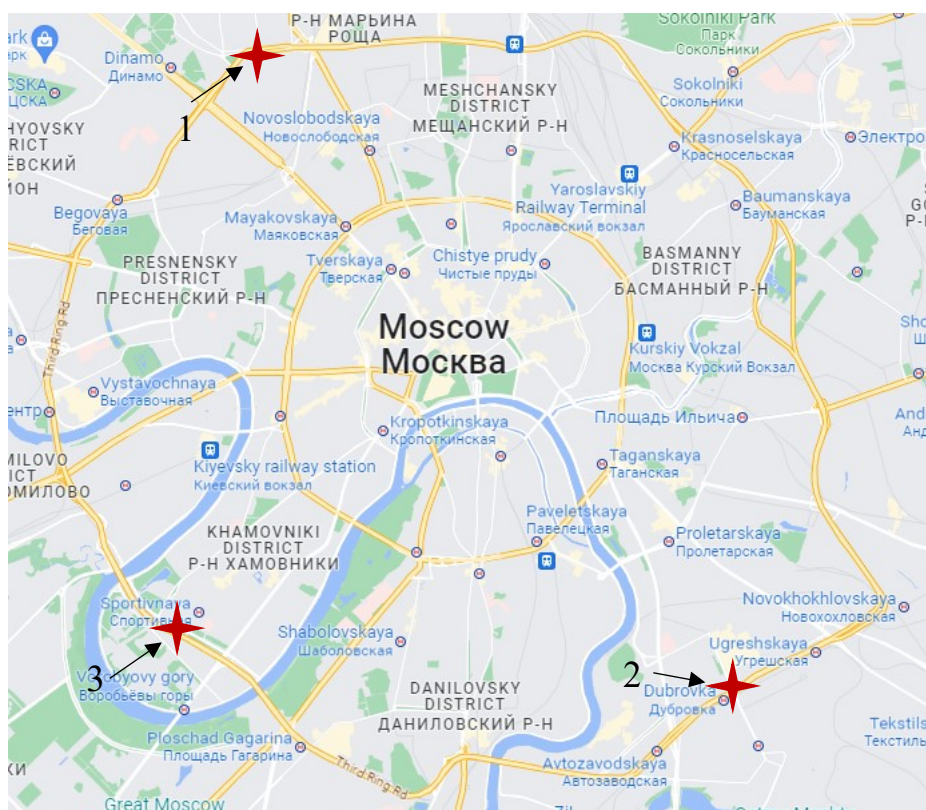

Fig. S1. Sampling sites (marked by red) of urban dust in Moscow central district.

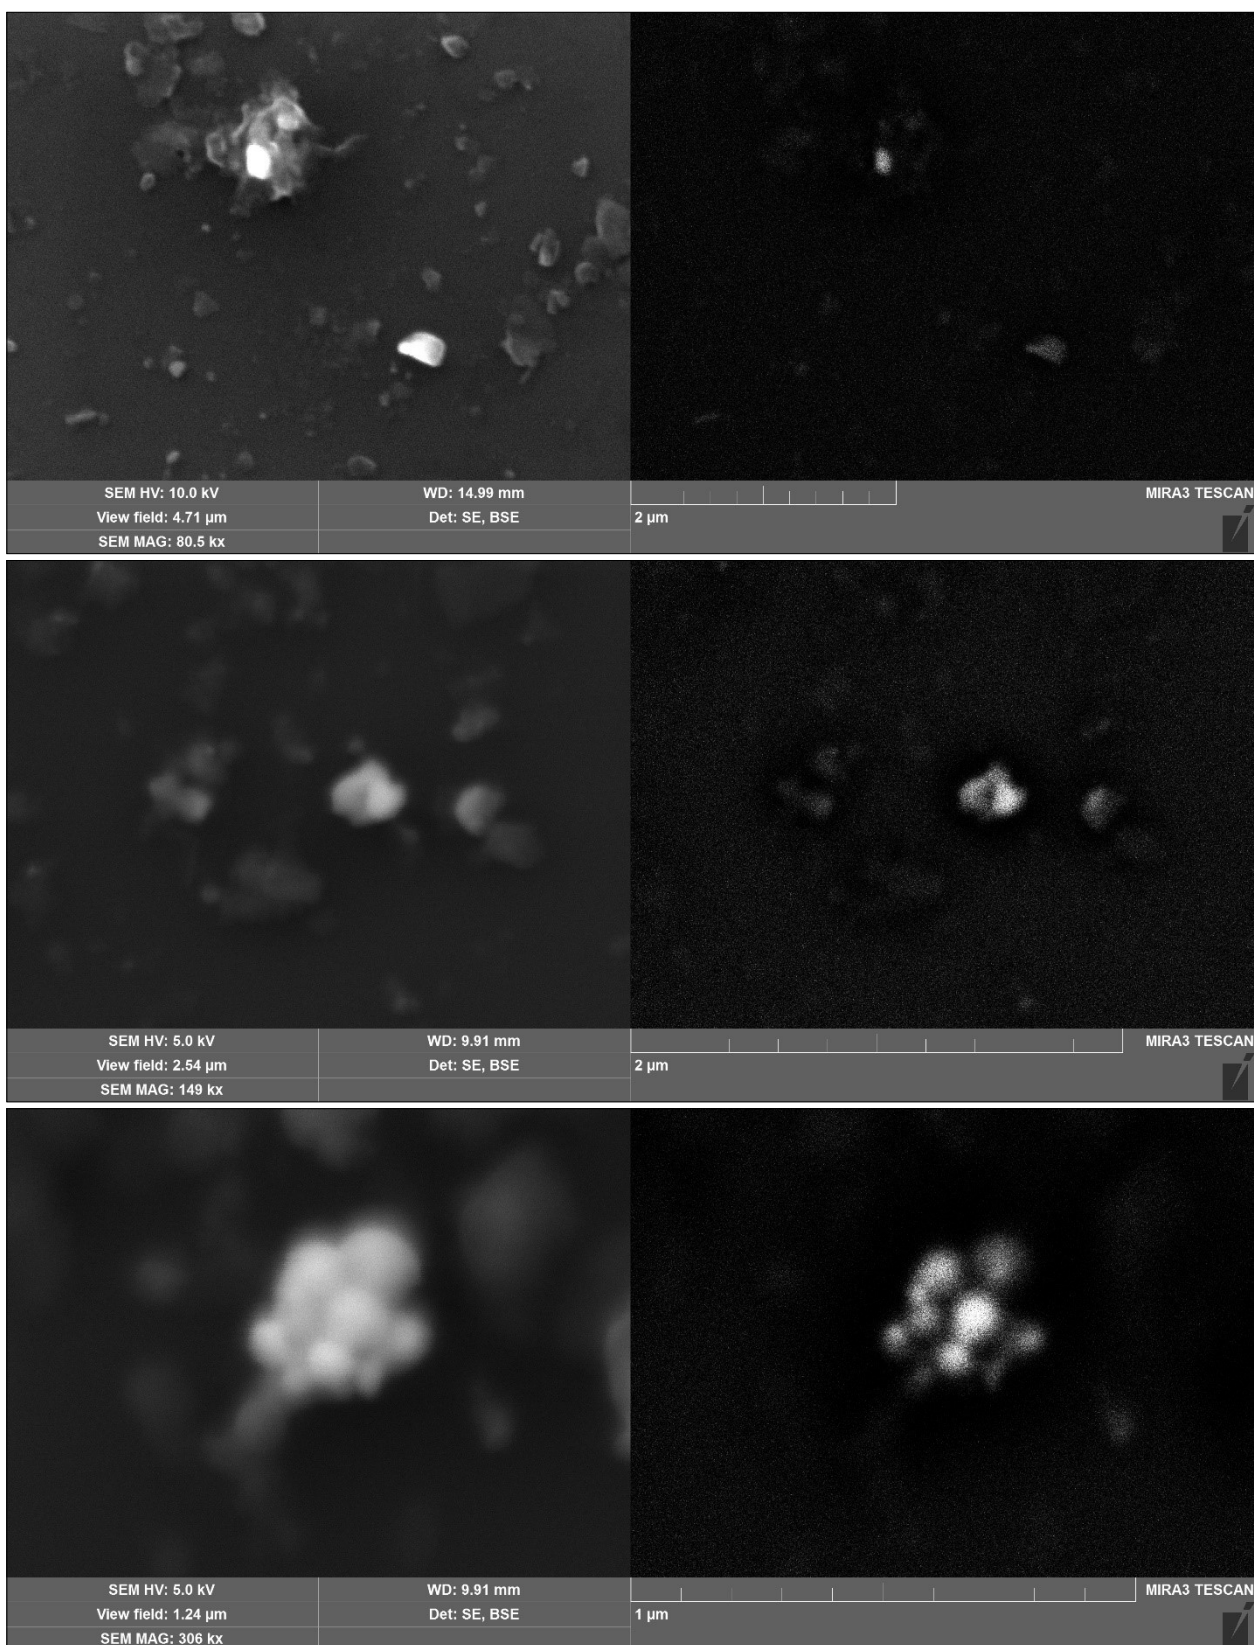

Fig. S2. Micrographs of NPs as obtained by scanning electron microscopy. The left micrographs were obtained by the secondary electrons mode, the right ones by the backscattered electrons mode

Table S1. Content of elements in three collected bulk samples and three corresponding recovered nanoparticle fractions as determined by ICP-MS and ICP-AES and in upper continental crust.

| Element | Concentration, $\mu\text{g kg}^{-1}$ |                   |                   |                   |                  |                  |                  |                  |
|---------|--------------------------------------|-------------------|-------------------|-------------------|------------------|------------------|------------------|------------------|
|         | LOD                                  | Bulk sample       |                   |                   | Nanoparticles    |                  |                  | UCC*             |
|         |                                      | 1                 | 2                 | 3                 | 1                | 2                | 3                |                  |
| 1       | 2                                    | 3                 | 4                 | 5                 | 6                | 7                | 8                | 9                |
| Li      | 0.07                                 | 11.7              | 10.7              | 11.7              | 14               | 103              | 21               | 24               |
| Be      | 0.07                                 | 1.1               | 0.9               | 1.1               | < LOD            | < LOD            | 1.4              | 2,1              |
| B       | 8                                    | -                 | -                 | -                 | 114              | < LOD            | 161              | 17               |
| Na      | 34                                   | $11.6 \cdot 10^3$ | $11.7 \cdot 10^3$ | $15.0 \cdot 10^3$ | $23 \cdot 10^3$  | $30 \cdot 10^3$  | $10 \cdot 10^3$  | $24 \cdot 10^3$  |
| Mg      | 18                                   | $16.1 \cdot 10^3$ | $17.7 \cdot 10^3$ | $23.3 \cdot 10^3$ | $5.5 \cdot 10^3$ | $41 \cdot 10^3$  | $11 \cdot 10^3$  | $15 \cdot 10^3$  |
| Al      | 47                                   | $44.5 \cdot 10^3$ | $47.8 \cdot 10^3$ | $55.9 \cdot 10^3$ | $8.5 \cdot 10^3$ | $121 \cdot 10^3$ | $25 \cdot 10^3$  | $81 \cdot 10^3$  |
| P       | 150                                  | $1.2 \cdot 10^3$  | $0.8 \cdot 10^3$  | $1.5 \cdot 10^3$  | $4.6 \cdot 10^3$ | $15 \cdot 10^3$  | $17 \cdot 10^3$  | $0.7 \cdot 10^3$ |
| S       | 83                                   | $1.8 \cdot 10^3$  | $1.2 \cdot 10^3$  | $2.5 \cdot 10^3$  | $10 \cdot 10^3$  | $32 \cdot 10^3$  | $28 \cdot 10^3$  | $0.6 \cdot 10^3$ |
| K       | 45                                   | $11.6 \cdot 10^3$ | $11.7 \cdot 10^3$ | $10.3 \cdot 10^3$ | $5.5 \cdot 10^3$ | $31 \cdot 10^3$  | $24 \cdot 10^3$  | $23 \cdot 10^3$  |
| Ca      | 65                                   | $98.4 \cdot 10^3$ | $86.8 \cdot 10^3$ | $93.4 \cdot 10^3$ | $31 \cdot 10^3$  | $78 \cdot 10^3$  | $67 \cdot 10^3$  | $26 \cdot 10^3$  |
| Sc      | 2                                    | 13.4              | 13.7              | 22.8              | < LOD            | < LOD            | < LOD            | 14               |
| Ti      | 8                                    | $4.9 \cdot 10^3$  | $4.8 \cdot 10^3$  | $11.4 \cdot 10^3$ | $0.2 \cdot 10^3$ | $1.6 \cdot 10^3$ | $0.7 \cdot 10^3$ | $3.8 \cdot 10^3$ |
| V       | 5                                    | 134               | 117               | 278               | 95               | < LOD            | 70               | 97               |
| Cr      | 6                                    | 105               | 109               | 102               | 24               | 370              | 140              | 92               |
| Mn      | 2                                    | $0.8 \cdot 10^3$  | $1.0 \cdot 10^3$  | $1.2 \cdot 10^3$  | $0.2 \cdot 10^3$ | $2.2 \cdot 10^3$ | $0.6 \cdot 10^3$ | $0.8 \cdot 10^3$ |
| Fe      | 37                                   | $50.5 \cdot 10^3$ | $77.3 \cdot 10^3$ | $92.3 \cdot 10^3$ | $10 \cdot 10^3$  | $176 \cdot 10^3$ | $33 \cdot 10^3$  | $35 \cdot 10^3$  |
| Co      | 1                                    | 21.4              | 18.9              | 34.3              | < LOD            | 117              | 21               | 17,3             |
| Ni      | 4                                    | 62                | 50                | 55                | < LOD            | < LOD            | 54               | 47               |
| Cu      | 3                                    | 111               | 82                | 305               | $0.2 \cdot 10^3$ | $2 \cdot 10^3$   | $1 \cdot 10^3$   | 28               |
| Zn      | 6                                    | $0.5 \cdot 10^3$  | $2.2 \cdot 10^3$  | $0.6 \cdot 10^3$  | $0.8 \cdot 10^3$ | $37 \cdot 10^3$  | $2 \cdot 10^3$   | 67               |
| Ga      | 1                                    | 10.5              | 9.8               | 14.0              | < LOD            | < LOD            | 9                | 17,5             |
| As      | 1                                    | 6.5               | 6.2               | 4.8               | < LOD            | < LOD            | < LOD            | 4,8              |
| Se      | 4                                    | < LOD             | < LOD             | < LOD             | < LOD            | < LOD            | < LOD            | -                |
| Rb      | 0.1                                  | 48                | 44                | 40                | 22               | 187              | 67               | 84               |
| Sr      | 0.3                                  | 276               | 263               | 294               | 109              | 430              | 228              | 320              |
| Y       | 0.01                                 | 21                | 17                | 29                | 3.8              | 38.9             | 11.9             | 21               |
| Zr      | 0.9                                  | 148               | 120               | 210               | 14.5             | 75.0             | 38.6             | 193              |
| Nb      | 0.1                                  | 8.9               | 7.9               | 14.5              | 25.8             | 6.9              | 1.4              | 12               |
| Mo      | 0.5                                  | 4.1               | 4.5               | 5.3               | 9.9              | < LOD            | 3.7              | 1,1              |
| Rh      | 0.05                                 | < LOD             | < LOD             | < LOD             | < LOD            | < LOD            | < LOD            | -                |
| Pd      | 0.2                                  | < LOD             | < LOD             | < LOD             | < LOD            | < LOD            | < LOD            | 0,00052          |
| Ag      | 0.03                                 | 0.14              | 0.11              | 0.33              | 2.38             | 14               | 5.9              | 0,053            |
| Cd      | 0.07                                 | 0.33              | 0.19              | 0.23              | < LOD            | < LOD            | 2.1              | 0,09             |
| Sn      | 0.4                                  | 5.8               | 6.3               | 6.8               | 60               | < LOD            | 7.6              | 2,1              |
| Sb      | 0.04                                 | 5.9               | 4.7               | 5.4               | 5.7              | 51               | 20               | 0,4              |
| Te      | 0.1                                  | < LOD             | < LOD             | < LOD             | < LOD            | < LOD            | < LOD            | -                |
| Cs      | 0.01                                 | 1.0               | 0.9               | 0.9               | 0.9              | 12               | 2.5              | 4,9              |
| Ba      | 0.9                                  | 450               | 390               | 461               | 115              | 700              | 360              | 628              |
| La      | 0.01                                 | 26                | 21                | 31                | 4.9              | 67               | 31               | 31               |
| Ce      | 0.03                                 | 57                | 45                | 68                | 12               | 145              | 35               | 63               |

| 1  | 2     | 3     | 4     | 5     | 6     | 7     | 8     | 9      |
|----|-------|-------|-------|-------|-------|-------|-------|--------|
| Pr | 0.01  | 5.8   | 4.7   | 7.5   | 1.1   | 14    | 3.8   | 7,1    |
| Nd | 0.01  | 24    | 20    | 32    | 5.3   | 57    | 15    | 27     |
| Sm | 0.01  | 4.7   | 4.0   | 6.3   | 0.9   | 11    | 2.8   | 4,7    |
| Eu | 0.005 | 1.0   | 0.8   | 1.4   | 0.05  | 1.3   | 0.5   | 1      |
| Gd | 0.005 | 4.1   | 3.5   | 5.8   | 0.07  | 6.1   | 2.0   | 4      |
| Tb | 0.006 | 0.6   | 0.5   | 0.9   | 0.1   | 1.5   | 0.5   | 0,7    |
| Dy | 0.006 | 3.2   | 2.8   | 4.6   | 0.9   | 7.9   | 2.5   | 3,9    |
| Ho | 0.006 | 0.7   | 0.6   | 1.0   | 0.1   | 1.6   | 0.5   | 0,83   |
| Er | 0.005 | 1.9   | 1.7   | 2.8   | 0.4   | 4.4   | 1.2   | 2,3    |
| Tm | 0.006 | 0.3   | 0.2   | 0.4   | < LOD | 0.7   | 0.2   | 0,3    |
| Yb | 0.006 | 1.8   | 1.6   | 2.7   | 0.4   | 3.4   | 1.0   | 1,96   |
| Lu | 0.005 | 0.3   | 0.22  | 0.4   | 0.07  | 0.6   | 0.2   | 0,31   |
| Hf | 0.04  | 4.1   | 3.3   | 5.9   | 0.4   | 22    | 1.7   | 5,3    |
| Ta | 0.06  | 0.6   | 0.6   | 0.9   | < LOD | < LOD | < LOD | 0,9    |
| W  | 0.03  | 8.8   | 8.7   | 8.4   | 5.8   | 34    | 11    | 1,9    |
| Re | 0.01  | < LOD | 0,0005 |
| Ir | 0.01  | < LOD | 0,0015 |
| Pt | 0.02  | < LOD | 0,05   |
| Au | 0.07  | < LOD | 0.04  | < LOD | < LOD | < LOD | < LOD | 0,9    |
| Hg | 0.1   | 0.03  | 0.02  | 0.03  | 2.2   | < LOD | 11    | 17     |
| Tl | 0.01  | 0.2   | 0.2   | 0.2   | 0.3   | < LOD | 0.5   | 0,16   |
| Pb | 0.2   | 41    | 41    | 51    | 79    | 3000  | 330   | 10,5   |
| Bi | 0.01  | 0.5   | 0.5   | 1.1   | 0.7   | 7.6   | 3.1   | 2,7    |
| Th | 0.03  | 5.9   | 5.4   | 5.5   | 2.3   | 7.5   | 5.2   | 7,1    |
| U  | 0.01  | 1.8   | 1.3   | 2.0   | 0.7   | 12.8  | 3.3   | 27     |

– Upper continental crust (R. L. Rudnick and S. Gao, *TrGeo*, 2003, **3**, 659)

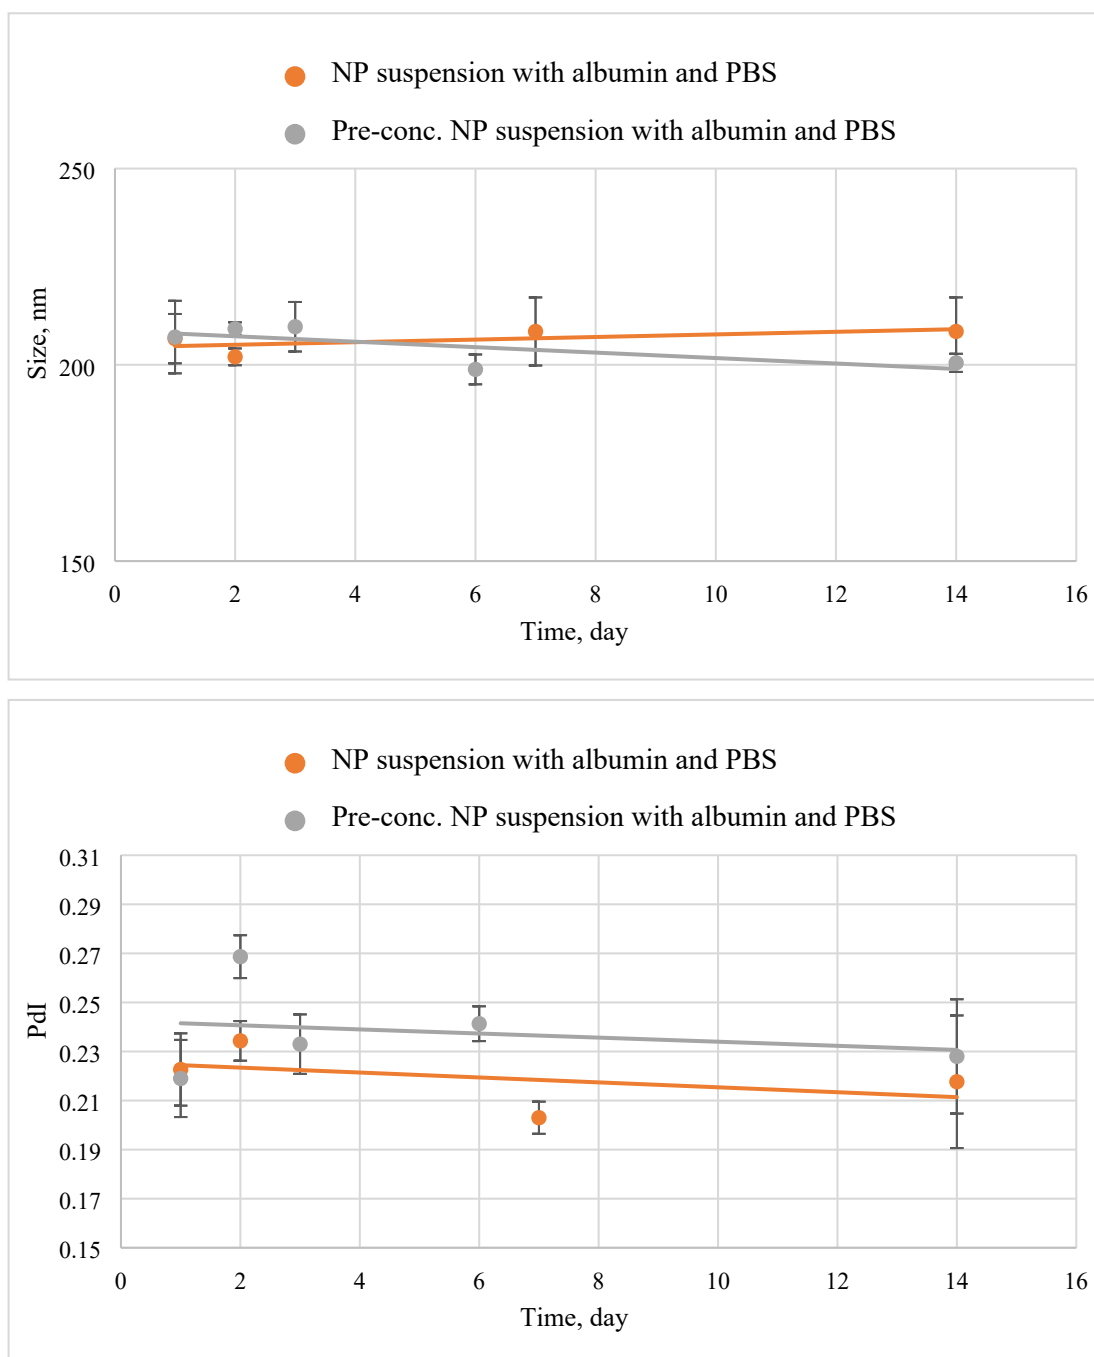

Fig. S3.  $Z_{av}$  and Pdl of NPs suspension with albumin and PBS (orange line) and pre-concentrated NPs suspension with albumin and PBS (grey line) as measured by DLS. Error bars represent SD from three independent measurements.
